# Supplementary material
Source: HighWire-hosted journal article supplement (https://www.rcpjournals.org/highwire/filestream/10784/field_highwire_adjunct_files/1/Hallewell_Supplementary_S2.pdf)
Supplement: Hallewell_Supplementary_S2.pdf [file Hallewell_Supplementary_S2.pdf]

## Supplementary material S2

### Medicine Return to Practice Pre-Course Questionnaire

Date \_\_\_\_\_

We gather information to improve our courses and to share learning.

This is confidential. Responses are aggregated and never used to identify individuals.

I consent to the processing of my personal information for the purposes explained to me. I understand that such information will be treated in accordance with the terms of the Data Protection Act 1998.

Tick to consent

**Please create your own unique ID for pre and post course comparison. Use your initials followed by your day and month of birth (e.g. If your name is *Aisha Patel* and you were born on the *4th July* put AP0407)**

\_\_\_/\_\_\_/\_\_\_

If you are happy to be contacted for later data collection and follow-up please provide a contact email:

\_\_\_\_\_

Current role

College Tutor

Programme Director

Educational Supervisor

Consultant

Clinical Supervisor

Other (please clarify)

Place of work

\_\_\_\_\_

Speciality

\_\_\_\_\_

What do you hope to achieve from this course?

\_\_\_\_\_

\_\_\_\_\_

Please turn the page

What is your current level of understanding of the SuppoRTT programme (rate 1-100)

---

For each statement below please state how certain you are that you can do the things described.

Rate your degree of confidence by writing a number between 1 and 100 using this scale.

|                         |    |    |                          |    |    |    |                              |    |    |     |
|-------------------------|----|----|--------------------------|----|----|----|------------------------------|----|----|-----|
| 0                       | 10 | 20 | 30                       | 40 | 50 | 60 | 70                           | 80 | 90 | 100 |
| <i>Cannot do at all</i> |    |    | <i>Moderately can do</i> |    |    |    | <i>Highly certain can do</i> |    |    |     |

|   |                                                                                                                                          |  |
|---|------------------------------------------------------------------------------------------------------------------------------------------|--|
| 1 | Explain the reasons why trainees might take time out of training                                                                         |  |
| 2 | Manage a trainee returning to practice after time out of training                                                                        |  |
| 3 | Signpost trainees and colleagues to appropriate resources to help with return to training                                                |  |
| 4 | Explain the importance of supporting returning trainees to patient safety and staff wellbeing/retention.                                 |  |
| 5 | Take a leadership role in your trust/organisation in supporting trainees returning to training/ developing return to training resources. |  |

Thank you for completing this form.

## Medicine Return to Practice Post-Course Questionnaire

Date \_\_\_\_\_

We gather information to improve our courses and to share learning.

This is confidential. Responses are aggregated and never used to identify individuals.

I consent to the processing of my personal information for the purposes explained to me. I understand that such information will be treated in accordance with the terms of the Data Protection Act 1998.

Tick to consent

**Please complete your unique ID for pre and post course comparison. Use your initials followed by your day and month of birth (e.g. If your name is *Aisha Patel* and you were born on the *4th July* put AP0407)**

\_\_\_/\_\_\_/\_\_\_

Please rate the following items regarding the course from 1 (not at all happy) to 100 (completely happy)

|   |                                                      |  |
|---|------------------------------------------------------|--|
| 1 | Met stated aims                                      |  |
| 2 | Met your own learning needs/ expectation for the day |  |
| 3 | Interesting                                          |  |
| 4 | Relevant                                             |  |
| 5 | Facilitation/ teaching                               |  |
| 6 | Overall satisfaction                                 |  |

Please outline 3 things you have learnt today:

1. \_\_\_\_\_
2. \_\_\_\_\_
3. \_\_\_\_\_

Please give a specific example of something you will change in your practice as a result of this course.

\_\_\_\_\_  
\_\_\_\_\_

Please outline one area of improvement for the course

\_\_\_\_\_  
\_\_\_\_\_

What is your current level of understanding of the SupportTT programme (rate 1-100)

---

For each statement below please state how certain you are that you can do the things described.

Rate your degree of confidence by writing a number between 1 and 100 using this scale.

|                         |           |           |                          |           |           |           |                              |           |           |            |
|-------------------------|-----------|-----------|--------------------------|-----------|-----------|-----------|------------------------------|-----------|-----------|------------|
| <b>0</b>                | <b>10</b> | <b>20</b> | <b>30</b>                | <b>40</b> | <b>50</b> | <b>60</b> | <b>70</b>                    | <b>80</b> | <b>90</b> | <b>100</b> |
| <i>Cannot do at all</i> |           |           | <i>Moderately can do</i> |           |           |           | <i>Highly certain can do</i> |           |           |            |

|   |                                                                                                                                          |  |
|---|------------------------------------------------------------------------------------------------------------------------------------------|--|
| 1 | Explain the reasons why trainees might take time out of training                                                                         |  |
| 2 | Manage a trainee returning to practice after time out of training                                                                        |  |
| 3 | Signpost trainees and colleagues to appropriate resources to help with return to training                                                |  |
| 4 | Explain the importance of supporting returning trainees to patient safety and staff wellbeing/retention.                                 |  |
| 5 | Take a leadership role in your trust/organisation in supporting trainees returning to training/ developing return to training resources. |  |

Thank you for completing this form.
